# Supplementary material for: α-Mangostin Alleviated HIF-1α-Mediated Angiogenesis in Rats With Adjuvant-Induced Arthritis by Suppressing Aerobic Glycolysis
Source: Front Pharmacol. 2021 Dec 20;12:785586. doi: 10.3389/fphar.2021.785586 (PMC8721667; doi:10.3389/fphar.2021.785586)
Supplement: Supplementary file 5 [file Table4.XLSX]

## Sheet: body weight
Day	Normal-1	Normal-2	Normal-3	Normal-4	Normal-5	Normal-6	AIA-1	AIA-2	AIA-3	AIA-4	AIA-5	AIA-6	MAN-1	MAN-2	MAN-3	MAN-4	MAN-5	MAN-6
1	280	284	306	286	293	302	292	290	295	282	285	285	292	289	260	263	292	292
5	295	305	330	306	308	323	283	313	300	294	281	290	298	290	253	293	301	300
7	298	310	326	308	305	320	266	330	273	267	285	292	288	298	260	272	310	317
11	328	330	360	329	346	365	281	334	286	295	274	274	300	296	249	270	299	320
15	337	350	374	324	330	365	281	334	279	301	290	268	300	306	253	290	280	321
17	312	324	347	303	353	384	280	298	270	298	260	269	272	286	235	272	270	291
20	360	367	404	339	390	390	270	306	266	301	280	270	280	300	250	296	280	288
23	352	365	402	330	380	380	270	295	276	313	284	276	287	307	250	302	284	291
25	380	387	420	364	416	410	292	295	275	326	287	278	300	313	260	321	284	291
29	386	390	433	373	400	402	301	328	287	338	302	290	314	335	281	330	314	332
32	360	385	380	317	352	346	293	248	279	325	257	250	316	337	290	345	324	277

## Sheet: arthritis scores
Day	AIA-1	AIA-2	AIA-3	AIA-4	AIA-5	AIA-6	MAN-1	MAN-2	MAN-3	MAN-4	MAN-5	MAN-6
11	5	5	5	5	5	5	6	5	5	5	5	5
13	6	4	5	9	7	5	6	6	5	6	6	7
15	6	7	5	11	7	6	9	6	6	10	7	6
17	7	6	10	9	13	9	10	9	6	10	7	6
20	7	10	8	10	13	8	4	9	4	10	6	6
23	10	8	10	16	7	8	9	4	8	9	6	5
25	12	8	8	16	8	9	9	4	7	9	6	6
29	10	9	7	8	15	8	7	4	8	9	6	5
32	8	10	9	8	9	16	7	4	7	8	7	5

## Sheet: cell counts
	WBC 10^9/L	Lymphocytes 10^9/L	Intermediate cells 10^9/L	Granulocytes 10^9/L	RBC 10^12/L	HGB g/ml	PLT 10^9/L
Normal-1	2.6	1.3	0.3	1	5.06	109	187
Normal-2	8.1	5	0.7	2.4	7.31	189	456
Normal-3	5.9	3.4	0.4	2.1	7.67	205	597
Normal-4	12.7	8.8	1.3	2.6	6.64	172	507
Normal-5	6.2	4.2	0.5	1.5	6.58	189	529
Normal-6	5.5	3.5	0.6	1.4	8.1	229	507
AIA-1	13.3	8.4	1.1	3.8	6.92	175	389
AIA-2	12.3	8	0.8	3.5	6.57	169	767
AIA-3	10.3	4.8	1.2	4.3	5.39	131	742
AIA-4	22.9	8	2.7	12.2	6.02	145	898
AIA-5	16.6	9.2	1	6.4	6.74	160	597
AIA-6	32.1	20.2	3.2	8.7	5.92	156	430
MAN-1	5.9	3	0.7	2.2	6.35	163	1712
MAN-2	7.9	4.1	0.6	3.2	5.46	128	932
MAN-3	11.5	5.4	1	5.1	6.01	145	612
MAN-4	12.4	5.9	1.5	5	5.75	137	223
MAN-5	12.8	7.1	0.6	5.1	4.54	101	816
MAN-6	8.3	4.1	1	3.2	6.51	162	763
